# Supplementary material for: Improved low-temperature activity of La–Sr–Co–O nano-composite for CO oxidation by phase cooperation
Source: Royal Society of Chemistry journal article supplement (doi:10.1039/c4ra10902c), 2014-01-01
Supplement: c4ra10902c1.pdf [file c4ra10902c1.pdf]

## Improved low-temperature activity of La-Sr-Co-O nano-composite for CO oxidation by phase cooperation

Linyun Zhong, Fang Hai, Ping Xiao, Jingping Hong and Junjiang Zhu

Key Laboratory of Catalysis and Materials Science of the State Ethnic Affairs & Commission Ministry of Education, South-Central University for Nationalities

### Table of contents

#### Experimental section

**Figure S1.** XRD patterns for the series of La-B-O samples (B = Fe, Co, Ni, Cu)

**Figure S2.** TEM images for (A)  $\text{Co}_3\text{O}_4$ , (B) La-Co-O prepared without template PMMA, (C) La-Co-O prepared with template PMMA

**Figure S3.** (A) La 3d, (B) Sr 3d, (C) Co 2p and (D) O 1s spectra for  $\text{La}_{1-x}\text{-Sr}_x\text{-Co-O}$  surveyed from the XPS measurements

**Figure S4.**  $\text{N}_2$  physisorption isotherms of the  $\text{La}_{0.7}\text{-Sr}_{0.3}\text{-Co-O}$  and the porous  $\text{LaCoO}_3$  prepared using PMMA as template

**Figure S5.** (A)  $\text{O}_2$ -TPD and (B)  $\text{H}_2$ -TPR profiles of  $\text{Co}_3\text{O}_4$ ,  $\text{La}_{0.7}\text{Sr}_{0.3}\text{CoO}_3$  and  $\text{La}_{0.7}\text{-Sr}_{0.3}\text{-Co-O}$

**Figure S6.** CO oxidation activity obtained from the La-Co-O sample prepared with and without template PMMA

**Figure S7.** Long-term stability of  $\text{Co}_3\text{O}_4$  for CO oxidation within 36 h conducted at 145 °C

**Figure S8.** Characteristic results from XRD,  $\text{N}_2$  physisorption isotherms and XPS for the used  $\text{La}_{0.7}\text{-Sr}_{0.3}\text{-Co-O}$

**Table S1.** Comparison in the activity ( $T_{\text{ign}}$ ,  $T_{50}$  and  $T_{100}$ ) of  $\text{La}_{0.7}\text{-Sr}_{0.3}\text{-Co-O}$  with that of  $\text{LaCoO}_3$  reported in literature

## Experimental

### Catalyst's Preparation.

The samples were prepared by a sol-gel method using ethylene glycol and formic acid as complexing agents. Briefly, 5 mmol of  $\text{La}(\text{NO}_3)_3$  and/or  $\text{Sr}(\text{NO}_3)_2$ , and 5 mmol of  $\text{Co}(\text{NO}_3)_3$ ,  $\text{Fe}(\text{NO}_3)_3$ ,  $\text{Ni}(\text{NO}_3)_2$ ,  $\text{Cu}(\text{NO}_3)_2$  or  $\text{Zn}(\text{NO}_3)_2$  were first dissolved in a mixed solution containing 3 mL ethylene glycol and 2 mL formic acid and stirred for 6 h. The resulting solution was then aged at 95 °C overnight, yielding a gel-like product, which was calcined in a static air oven at 600 °C for 5 h (heating rate 1 °C  $\text{min}^{-1}$ ). Such obtained samples showed a multi-phase structure and thus were denoted as  $\text{La}_{1-x}\text{Sr}_x\text{B-O}$  (B = Fe, Co, Ni, Cu,  $0 \leq x \leq 0.7$ ). For comparison, a perovskite  $\text{La}_{0.7}\text{Sr}_{0.3}\text{CoO}_3$  was prepared by calcination at 800 °C, and a metal oxide  $\text{Co}_3\text{O}_4$  was prepared without the addition of La or Sr, with otherwise identical conditions.

### Catalyst's Characterizations

X-Ray diffraction (XRD) patterns were collected using a Bruker D8 Advance X-ray diffractometer with Cu  $\text{K}\alpha$  ( $\lambda = 1.5406 \text{ \AA}$ ) irradiation; Transmission electron microscopy (TEM) images were obtained on a Tecnai G<sup>2</sup> 20 S-Twin apparatus with high-resolution transmission electron microscope (200 kV). The sample was dispersed in ethanol by ultrasonic method before being deposited on the copper mesh.  $\text{N}_2$  physisorption isotherms were measured on a TriStar II 3020 measurement at liquid nitrogen temperature (-196 °C) and the surface areas were calculated using the Brunauer–Emmett–Teller (BET) method. Before measurement the sample was treated in vacuum at 200 °C for 5 h. X-ray photoelectron spectroscopy (XPS) spectra were recorded on a Thermo Electron Corporation VG Multilab 2000 apparatus using a monochromatic Al  $\text{K}\alpha$  X-ray source (300 W) and analyzer pass energy of 25 eV. Binding energies were obtained by referencing to the C 1s binding energy of carbon taken at 284.6 eV.

Temperature-programmed reduction by  $\text{H}_2$  ( $\text{H}_2$ -TPR) was performed on a

FINESORB-3010 apparatus (Fantai technology company, China) equipped with TCD detector. The sample (0.10 g) was first treated in Ar atmosphere at 500 °C for 1 h and then cooled to room temperature. Thereafter 10 vol.% H<sub>2</sub>/Ar mixture with flow rate of 25 cm<sup>3</sup> min<sup>-1</sup> was switched on. After a stabilized baseline is reached, the sample was heated from RT to 800 °C at a rate of 10 °C min<sup>-1</sup> to record the profile.

Temperature-programmed desorption of O<sub>2</sub> (O<sub>2</sub>-TPD) was carried out on the same apparatus. The sample (0.10 g) was first treated in O<sub>2</sub> atmosphere at 500 °C for 1 h and then cooled to room temperature. Thereafter Helium with flow rate of 25 cm<sup>3</sup> min<sup>-1</sup> was switched on. After a stabilized baseline is reached, the sample was heated from RT to 800 °C at a rate of 10 °C min<sup>-1</sup> to record the profile.

### **Catalytic tests**

Catalytic tests were measured using a continuous flow fixed-bed quartz microreactor (*i.d.* = 8 mm) equipped with a temperature programmed controller at atmospheric pressure. 0.1 g catalyst was loaded into the microreactor without dilution. The reactant 0.5% CO + 7.5% O<sub>2</sub> in Ar was passed at a flow rate of 50 mL min<sup>-1</sup>, corresponding to space velocity (SV) of ca. 30,000 mL g<sup>-1</sup> h<sup>-1</sup>. The effluent gases were analyzed by an on-line GC (Agilent 7890) equipped with a thermal conductivity detector and two packed columns (Porapak Q and 5A molecular sieve columns). CO oxidation activity was evaluated in terms of CO conversion: % Conversion =  $\{[CO]_{in} - [CO]_{out}\} / [CO]_{in} * 100$ , where  $[CO]_{in}$  and  $[CO]_{out}$  represent the inlet and outlet concentration of CO, respectively.

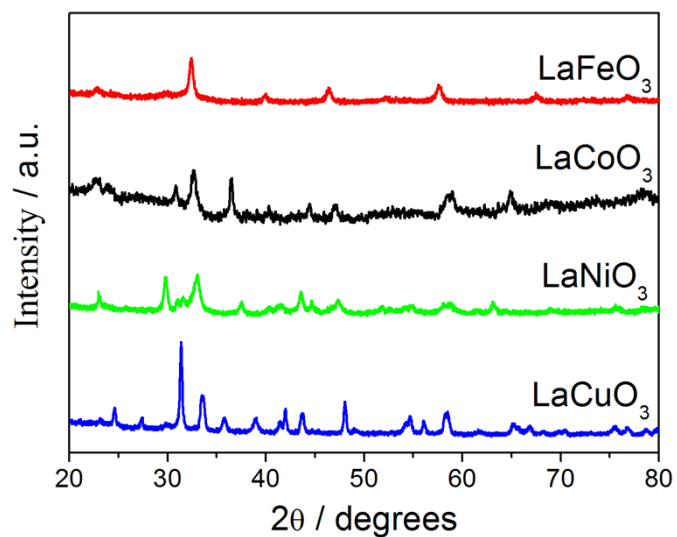

**Figure S1.** XRD patterns for the series of La-B-O samples (B = Fe, Co, Ni, Cu)

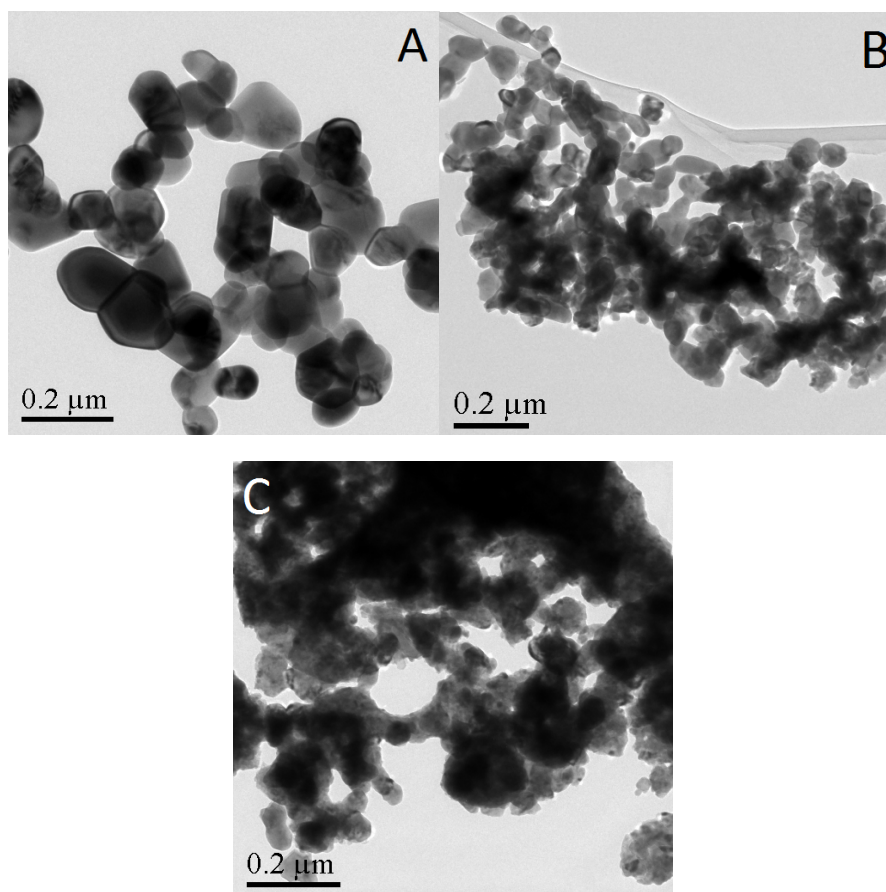

**Figure S2.** TEM images for (A)  $\text{Co}_3\text{O}_4$ , (B) La-Co-O prepared without template PMMA, (C) La-Co-O prepared with template PMMA

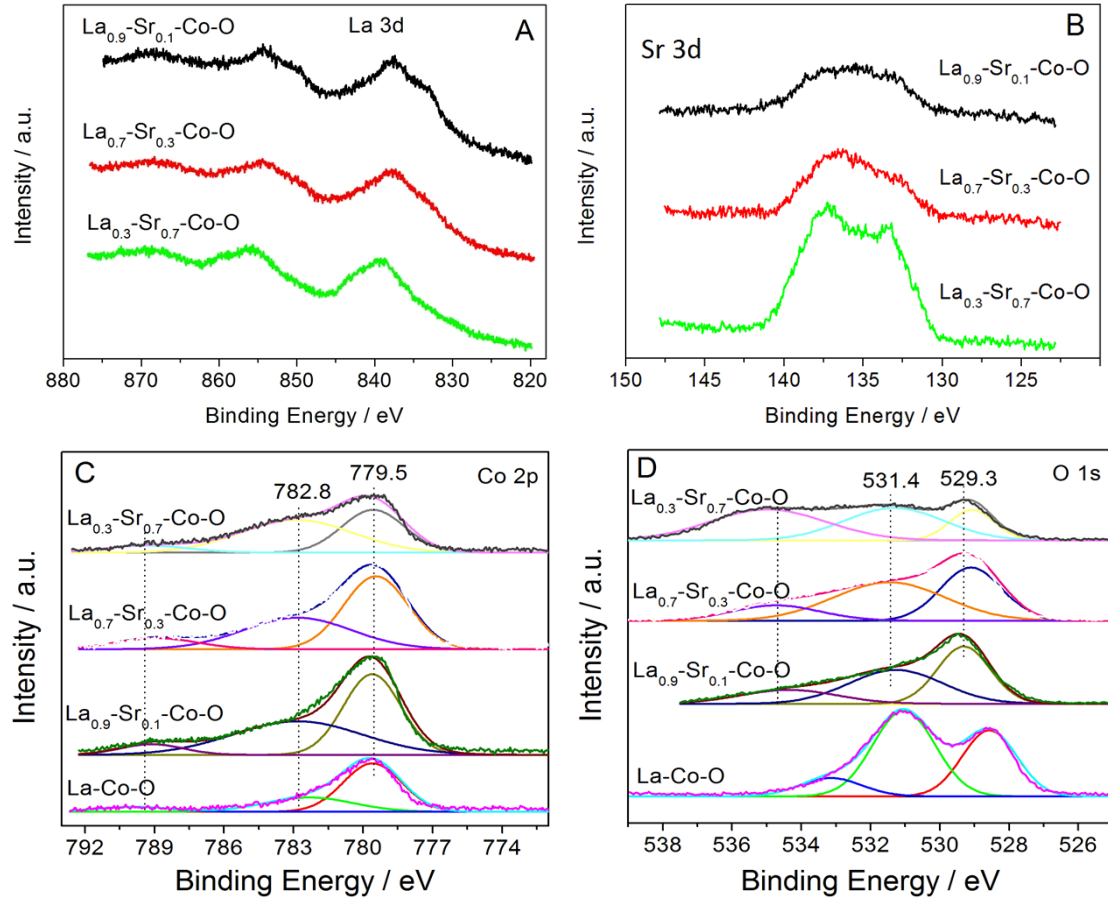

**Figure S3.** (A) La 3d, (B) Sr 3d, (C) Co 2p and (D) O 1s spectra for  $\text{La}_{1-x}\text{Sr}_x\text{Co-O}$  surveyed from the XPS measurements

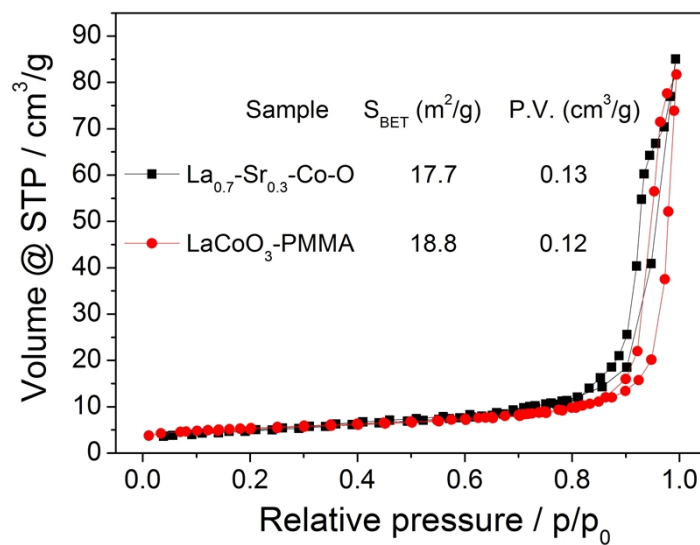

**Figure S4.**  $\text{N}_2$  physisorption isotherms of the  $\text{La}_{0.7}\text{Sr}_{0.3}\text{Co-O}$  and the porous  $\text{LaCoO}_3$  prepared using PMMA as template

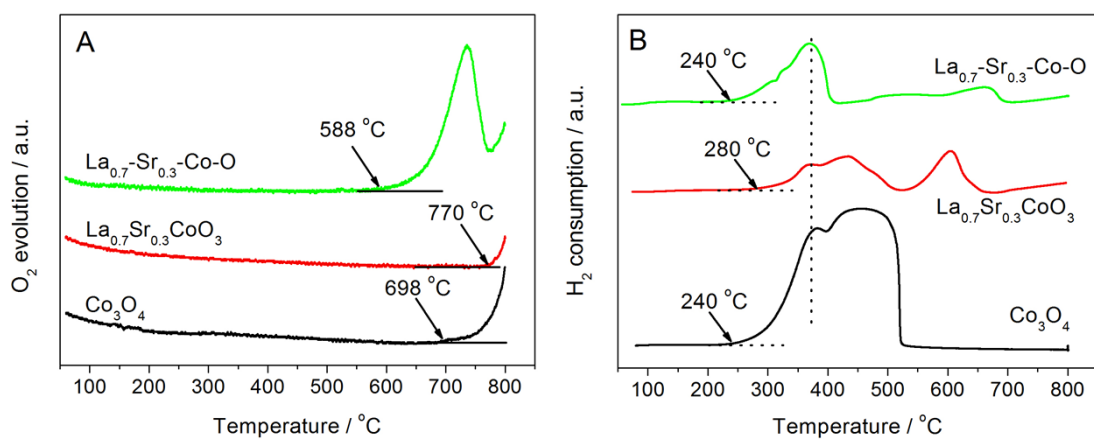

**Figure S5.** (A)  $\text{O}_2$ -TPD and (B)  $\text{H}_2$ -TPR profiles of  $\text{Co}_3\text{O}_4$ ,  $\text{La}_{0.7}\text{Sr}_{0.3}\text{CoO}_3$  and  $\text{La}_{0.7}\text{-Sr}_{0.3}\text{-Co-O}$

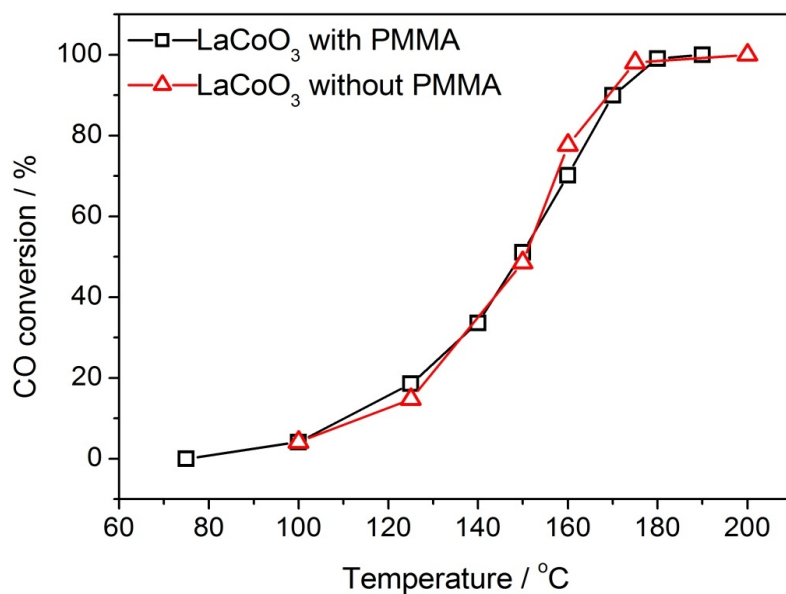

**Figure S6.** CO oxidation activity obtained from the  $\text{LaCoO}_3$  sample prepared with and without template PMMA

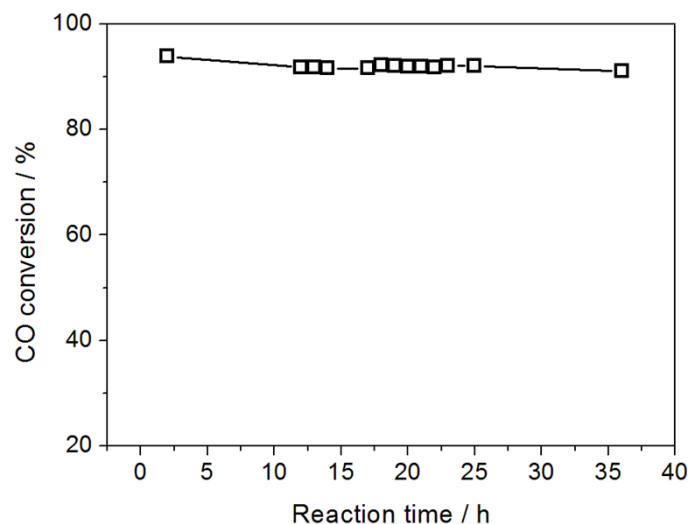

**Figure S7.** Long-term stability of  $\text{Co}_3\text{O}_4$  for CO oxidation within 36 h measured at  $145^\circ\text{C}$

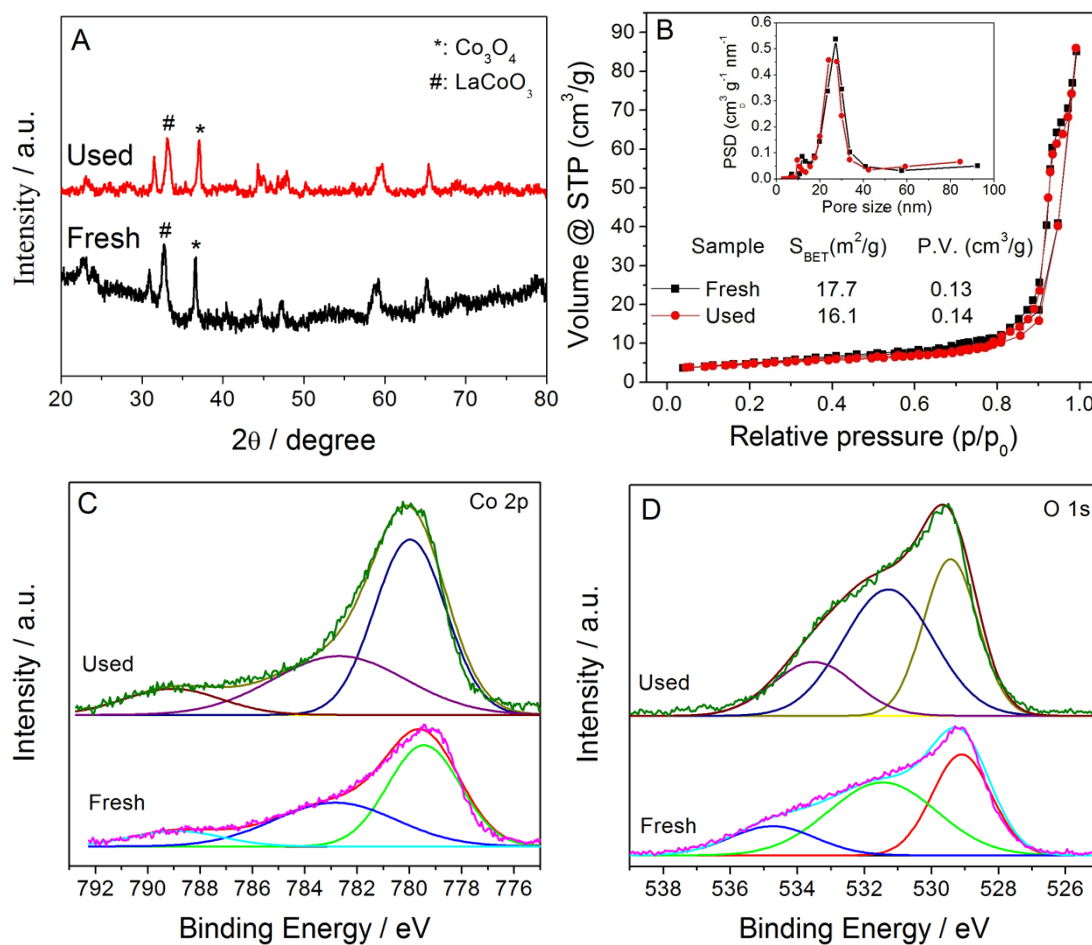

**Figure S8.** Characteristic results from XRD,  $\text{N}_2$  physisorption isotherms and XPS for the fresh and used  $\text{La}_{0.7}\text{-Sr}_{0.3}\text{-Co-O}$

**Table S1.** Comparison in the activity ( $T_{\text{ign}}$ ,  $T_{50}$  and  $T_{100}$ ) of  $\text{La}_{0.7}\text{-Sr}_{0.3}\text{-Co-O}$  with that of  $\text{LaCoO}_3$  reported in literature

| Catalyst                                      | $T_{\text{ign}}^a$ | $T_{50}^b$ | $T_{100}^c$ | Reaction conditions                                       | Refs.     |
|-----------------------------------------------|--------------------|------------|-------------|-----------------------------------------------------------|-----------|
| $\text{La}_{0.7}\text{-Sr}_{0.3}\text{-Co-O}$ | 75                 | 130        | 174         | 0.5% CO, 7.5% O <sub>2</sub> , WHSV = 30000 mL/(g h)      | This work |
| La-Co-O                                       | 100                | 150        | 200         | 0.5% CO, 7.5% O <sub>2</sub> , WHSV = 30000 mL/(g h)      | This work |
| $\text{LaCoO}_3$ (porous)                     | 60                 | 145        | 175         | 0.5% CO, 7.5% O <sub>2</sub> , WHSV = 30000 mL/(g h)      | 1         |
| $\text{LaCoO}_3$ (Nano-sized)                 | 100                | 161        | 200         | 1% CO, 20% O <sub>2</sub> , WHSV = 10000 mL/(g h)         | 2         |
| $\text{LaCoO}_3$ (spherical)                  | 70                 | 131        | 170         | 1% CO, 20% O <sub>2</sub> , WHSV = 10000 mL/(g h)         | 2         |
| $\text{LaCoO}_3$ (3DOM)                       | 50                 | 162        | 190         | 1% CO, 20% O <sub>2</sub> , WHSV = 10000 mL/(g h)         | 3         |
| $\text{LaCoO}_3$                              | 120                | 182        | 215         | 1% CO, 20% O <sub>2</sub> , WHSV = 10000 mL/(g h)         | 3         |
| $\text{LaCoO}_3$ (porous)                     | 110                | 170        | 207         | 1% CO, 21% O <sub>2</sub> , WHSV = 3000 mL/(g h)          | 4         |
| $\text{LaCoO}_3$                              | 140                | 187        | 237         | 1% CO, 21% O <sub>2</sub> , WHSV = 3000 mL/(g h)          | 4         |
| $\text{La}_{0.9}\text{K}_{0.1}\text{CoO}_3$   | 160                | 245        | 335         | Not applicable from the literature                        | 5         |
| $\text{LaCoO}_3$                              | 130                | 205        | 246         | 0.5% CO, 10% O <sub>2</sub> , SV = 96,000 h <sup>-1</sup> | 6         |
| $\text{LaCoO}_3$                              | 160                | 238        | 270         | 2% CO, 20% O <sub>2</sub> , SV = 6000 h <sup>-1</sup>     | 7         |
| $\text{LaCoO}_3$                              | 115                | 172        | 210         | 0.5% CO, 10% O <sub>2</sub> , SV = 30,000 h <sup>-1</sup> | 8         |
| $\text{LaCoO}_3$                              | 260                | 280        | 400         | 2% CO, 1% O <sub>2</sub> , WHSV = 30000 mL/(g h)          | 9         |

a Ignition temperature for CO oxidation; b Temperature for 50% CO conversion; c Temperature for 100% CO conversion

## References

1. P. Xiao, J. Zhu, H. Li, W. Jiang, T. Wang, Y. Zhu, Y. Zhao and J. Li, *ChemCatChem*, 2014, **6**, 1774-1781.
2. Y. Liu, H. Dai, J. Deng, L. Zhang, Z. Zhao, X. Li, Y. Wang, S. Xie, H. Yang and G. Guo, *Inorg. Chem.*, 2013, **52**, 8665-8676.
3. X. Li, H. Dai, J. Deng, Y. Liu, S. Xie, Z. Zhao, Y. Wang, G. Guo and H. Arandiyani, *Chem. Eng. J.*, 2013, **228**, 965-975.
4. Y. Wang, X. Cui, Y. Li, Z. Shu, H. Chen and J. Shi, *Micropor. Mesopor. Mater.*, 2013, **176**, 8-15.
5. Q. Thi Hoang Yen, T. Thi Minh Nguyet, T. Que Chi, N. Quoc Trung, N. Thi Toan and L. Dang Khuong, *Adv. Nat. Sci.: Nanosci. Nanotechnol.*, 2011, **2**, 045007.
6. S. Sun, L. Yang, G. Pang and S. Feng, *Appl. Catal. A: Gen.*, 2011, **401**, 199-203.
7. S. A. Nedil'ko, I. V. Fesich, A. G. Dzyaz'ko, O. Z. Didenko, G. R. Kosmambetova and P. E. Strizhak, *Theor. Exp. Chem.*, 2011, **47**, 183-187.
8. P. Doggali, S. Kusaba, Y. Teraoka, P. Chankapure, S. Rayalu and N. Labhsetwar, *Catal. Commun.*, 2010, **11**, 665-669.
9. B. Seyfi, M. Baghalha and H. Kazemian, *Chem. Eng. J.*, 2009, **148**, 306-311.
